# Hydrogen sulphide

T. L. Guidotti

*Occupational Health Program, University of Alberta, Faculty of Medicine, 13-103 Clinical Sciences Building, Edmonton, Alberta, T6G 2G3, Canada*

Hydrogen sulphide ( $H_2S$ ) is the primary chemical hazard in natural gas production in 'sour' gas fields. It is also a hazard in sewage treatment and manure-containment operations, construction in wetlands, pelt processing, certain types of pulp and paper production, and any situation in which organic material decays or inorganic sulphides exist under reducing conditions.  $H_2S$  dissociates into free sulphide in the circulation. Sulphide binds to many macromolecules, among them cytochrome oxidase. Although this is undoubtedly an important mechanism of toxicity due to  $H_2S$ , there may be others.  $H_2S$  provides little opportunity for escape at high concentrations because of the olfactory paralysis it causes, the steep exposure-response relationships, and the characteristically sudden loss of consciousness it can cause which is colloquially termed 'knockdown.' Other effects may include mucosal irritation, which is associated at lower concentrations with a keratoconjunctivitis called 'gas eye' and at higher concentrations with risk of pulmonary oedema. Chronic central nervous system sequelae may possibly follow repeated knockdowns: this is controversial and the primary effects of  $H_2S$  may be confounded by anoxia or head trauma. Treatment is currently empirical, with a combination of nitrite and hyperbaric oxygen preferred. The treatment regimen is not ideal and carries some risk.

**Key words:** Hydrogen sulphide; keratoconjunctivitis; pulmonary oedema; sour gas.

Occup. Med. Vol. 46, 367–371, 1996

Received 1 July 1996; accepted in final form 2 August 1996.

## INTRODUCTION

Hydrogen sulphide ( $H_2S$ ) is the primary chemical hazard of natural gas production. It is also encountered in municipal sewers and sewage treatment plants, swine containment and manure-handling operations, pulp and paper operations (in Kraft and especially sulphite mill technologies), construction in wetlands, asphalt roofing, pelt processing and in any contained spaces in which organic material, such as fish or offal, has decayed or in which inorganic sulphides exist under reducing conditions.<sup>1–6</sup> It is in oil and gas production, however, that hydrogen sulphide appears most frequently as an industrial hazard. It is most often a hazard in well-drilling and servicing, pumping and gas refining in Texas, Oklahoma and the Gulf Coast of the United States, Alberta, the North Sea and the Middle East.

Occupational exposure to hydrogen sulphide is primarily a problem in the sour gas segment of the natural gas industry, which refers to natural gas with

a high concentration of natural sulphur. Although widely dispersed, sour gas is limited to relatively few natural gas fields worldwide. Sulphur is reduced to hydrogen sulphide during the prolonged degradation process of organic material underground that forms natural gas and petroleum. Hydrogen sulphide is a variable constituent of sour gas, ranging from low concentrations to 35% and more. The problem is uniquely severe in the Canadian province of Alberta, because of the heavy concentration of high-sulphur content oil and gas fields in the province.<sup>4,7–9</sup>

The  $H_2S$  in sour gas and pulp mills is accompanied by variable concentrations of methyl mercaptans ( $CH_3SH$ ,  $[CH_3]_2S$ , and  $[CH_3]_2S_2$ ) and carbonyl sulphide (COS), which are usually regarded to be of low toxicity. During gas processing some of these compounds are converted to  $H_2S$ . Mercaptans have a characteristic pungent odour. Mercaptans are also added to natural gas before distribution as a safety measure to ensure detection of leaks.<sup>2,10</sup>

## TOXICOLOGY

The toxicology of  $H_2S$  has been extensively reviewed in recent years by Turner and Fairhurst,<sup>11</sup> Beauchamp

Correspondence and reprint requests to: T. L. Guidotti, Occupational Health Program, University of Alberta, Faculty of Medicine, 13-103 Clinical Sciences Building, Edmonton, Alberta, T6G 2G3, Canada.

*et al.*,<sup>12</sup> Reiffenstein *et al.*,<sup>13</sup> Guidotti<sup>14</sup> and by Glass.<sup>15</sup> These reviews and the older summary literature<sup>16-18</sup> provide most of the following discussion.

H<sub>2</sub>S is inhaled and enters the circulation directly across the alveolar-capillary barrier, where it dissociates in part into sulphide ion, HS. Some remains as free H<sub>2</sub>S in blood and this fraction appears to interact with metalloproteins, disulphide-containing proteins, and thio-S-methyl-transferase, forming methyl sulphides. The sulphide ion binds to haeme compounds and is itself metabolized by oxidation to sulphate. Infusion of the sulphide ion alone into the circulation mimics the systemic effects of H<sub>2</sub>S inhalation but does not result in pulmonary oedema.

Sulphide interacts with a number of enzymes and other macromolecules, including haemoglobin and myoglobin. Although sulphaemoglobin may form after exposure, it does not appear to occur in sufficient quantities to contribute to the acute toxicity of H<sub>2</sub>S. Most macromolecules are held together by disulphide bonds, which are easily disrupted by aqueous sulphide. The critical target enzyme of sulphide is generally thought to be cytochrome oxidase, a family of related enzymes constituting the electron transport system in oxidative phosphorylation, the principal energy-generating system of the cell. Oxygen is the final

substrate of this system and is necessary to its function. The effect of sulphide in disrupting cytochrome oxidase activity is the same as oxygen deprivation or asphyxiation except that it may act more quickly. However, recent evidence suggests that other mechanisms besides cytochrome oxidase inhibition are responsible for the characteristic apnea of acute H<sub>2</sub>S toxicity.<sup>19</sup>

The exposure-response curve for lethality is extremely steep for hydrogen sulphide. The primary determinant of toxicity is the concentration rather than the duration of exposure. Thus, H<sub>2</sub>S does not follow 'Haber's Law,' that is the product of the concentration and the duration of exposure needed to achieve a given effect is not constant. Higher concentrations of H<sub>2</sub>S gives little margin of safety. Olfactory paralysis at higher exposure levels quickly ends perception of the characteristic smell of rotten eggs. Therefore, there is inadequate warning of the presence of H<sub>2</sub>S despite the low odour threshold. The exposure-response curve, as noted, is very steep.<sup>20</sup> The loss of consciousness often associated with overwhelming exposure reduces chances of flight. For these three reasons, H<sub>2</sub>S is an exceptionally difficult gas from which to escape.

Table 1 briefly summarizes the principal effects of H<sub>2</sub>S and the approximate thresholds for these responses. Acute central neurotoxicity, pulmonary oedema and

**Figure 1.** Exposure-response curves for hydrogen sulphide by species, adapted from an unpublished report by Dr Robert Rogers for the Alberta Energy Resources Conservation Board, 1990.

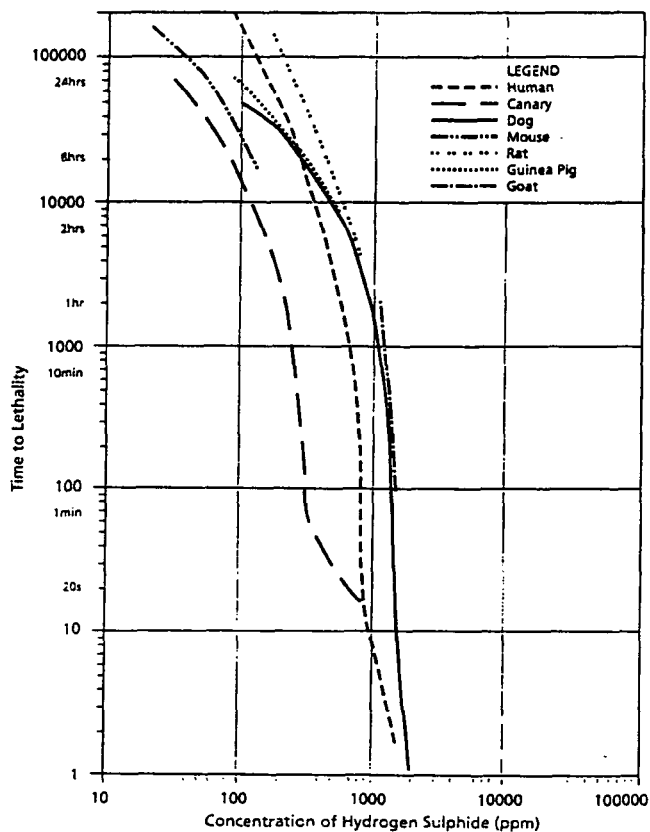

**Table 1.** Health effects of hydrogen sulphide at various exposure levels

| Concentration (ppm) | Effects                                                                                                                                                                                                           |
|---------------------|-------------------------------------------------------------------------------------------------------------------------------------------------------------------------------------------------------------------|
| 0.01-0.3            | Odour threshold (highly variable)                                                                                                                                                                                 |
| 1-5                 | Moderate offensive odour, may be associated with nausea, tearing of eyes, headaches or loss of sleep with prolonged exposure; healthy young male subjects experience no decline in maximal physical work capacity |
| 10                  | 8 hour occupational exposure limit in Alberta                                                                                                                                                                     |
| 15                  | 15 min occupational exposure limit in Alberta                                                                                                                                                                     |
| 20                  | Ceiling occupational exposure limit evacuation level in Alberta, odour very strong                                                                                                                                |
| 20-50               | Keratoconjunctivitis (eye irritation) and lung irritation. Possible eye damage after several days of exposure; may cause digestive upset and loss of appetite                                                     |
| 100                 | Eye and lung irritation; olfactory paralysis, odour disappears                                                                                                                                                    |
| 150-200             | Sense of smell paralyzed; severe eye and lung irritation                                                                                                                                                          |
| 250-500             | Pulmonary oedema may occur, especially if exposure is prolonged                                                                                                                                                   |
| 500                 | Serious damage to eyes within 30 min; severe lung irritation; unconsciousness and death within 4-8 hours; amnesia for period of exposure; 'knockdown'                                                             |
| 1,000               | Breathing may stop within one or two breaths; immediate collapse                                                                                                                                                  |

the mucosal effects are well documented in association with H<sub>2</sub>S. Odour followed by olfactory paralysis and keratoconjunctivitis are characteristic effects of H<sub>2</sub>S at lower concentrations. The acute toxicity of hydrogen sulphide is extensively documented.<sup>4,6,8,16,21-23</sup>

H<sub>2</sub>S-induced acute central toxicity leading to reversible unconsciousness is called a 'knockdown'. It is highly controversial whether repeated or prolonged knockdowns are associated with chronic neurological sequelae but the evidence is strongly suggestive. Knockdowns can be fatal as a consequence of respiratory paralysis and cellular anoxia. Respiratory paralysis may occur if exposure is prolonged, presumably as a direct consequence of sulphide toxicity inhibiting brainstem respiratory nuclei. Very high concentrations (500-1,000 ppm) may be associated with a knockdown. A knockdown may be fatal if exposure is prolonged. If exposure is transient, as usually happens in the oil patch, recovery may be equally rapid and apparently complete.<sup>4,17</sup>

H<sub>2</sub>S paralyzes the olfactory nerve, preventing perception of the otherwise strong smell. After experiencing a strong odour of rotten eggs, the odour disappears because of olfactory nerve paralysis. This removes a vital warning to, for example, oilfield workers caught in a cloud or entering a depression in which the gas has collected.<sup>11,16,18</sup>

H<sub>2</sub>S has a strong irritant effect on mucous membranes. The respiratory tract is particularly vulnerable because of its unprotected contact with the gas in air. H<sub>2</sub>S penetrates deeply into the respiratory tract because its solubility is relatively low, rendering it capable of causing alveolar injury leading to acute pulmonary oedema. The irritant effect is also seen in the upper airway; experimental studies suggest that the olfactory mucosa do not recover as fast as the bronchial epithelium.

'Gas eye', or keratoconjunctivitis, is a superficial inflammation of the cornea and conjunctiva that is often recurrent in workers in sour gas plants that are exposed for prolonged periods to relatively low concentrations. A peculiar feature of this effect is that it can be associated with reversible chromatic distortion and visual changes. This effect is sometimes accompanied by blepharospasm, tearing and photophobia.

Pulmonary oedema is also a well-recognized acute effect of H<sub>2</sub>S toxicity, especially when exposure is prolonged. The ultimate prognosis for recovery is generally good if the patient can be supported through the acute episode.<sup>4,16,24</sup>

Chronic central nervous system effects may be cumulative over several knockdowns, or if they represent the sequelae of minor brain damage resulting from anoxia or trauma. Investigators have found evidence for cognitive function abnormalities, labile affect and personality changes and anosmia, with a suggestion of increasing severity associated with length of time unconscious.<sup>5,14,25-29</sup>

Other possible effects of H<sub>2</sub>S include respiratory, cardiac, eye, and host defense disorders but the

evidence that H<sub>2</sub>S exposure leads to clinical disorders of these organ system remains inconclusive.<sup>14</sup>

## TREATMENT

The mainstay of immediate treatment is to remove the subject from the exposure, taking care to ensure that rescuers are properly protected and to resuscitate as required. Oxygen should be given at 100% by mask or by artificial ventilation and consideration should be given to hyperbaric oxygen in severe cases. Metabolic acidosis should be treated and the patient should be observed carefully for pulmonary oedema over the next 24 hours.<sup>30</sup>

Many specific antidotes to H<sub>2</sub>S intoxication have been proposed but few are in regular use.<sup>30-32</sup> Sodium nitrite has been proposed and there are anecdotal reports of survival following heavy exposure to H<sub>2</sub>S after treatment with nitrite. H<sub>2</sub>S resembles cyanide in that both bind reversibly to cytochromes, although there appear to be differences at the biochemical level. For this reason, treatment with nitrites has been advocated as a therapeutic approach to H<sub>2</sub>S toxicity, based upon the theory that the methaemoglobins so generated will displace the sulphide as they do with cyanide, and regenerate the active cytochrome oxidase.<sup>31</sup> However, investigators studying the kinetics of nitrite as an antidote have concluded that it can only be effective within the first few minutes following exposure and may actually slow sulphide removal thereafter. In laboratory studies, nitrite appears to work best as a pre-treatment rather than an effective treatment after exposure. However, it is attractive as a therapy because nitrite is readily available in emergency services. A practical problem is that methaemoglobinaemia may add to the anoxic burden that may already exist from the cytochrome poisoning, respiratory paralysis due to central toxicity, and ventilation-perfusion mismatch associated with pulmonary oedema. It may also induce hypotension (and reflex tachycardia) and further complicate the anoxia with hypoperfusion.<sup>32-35</sup>

Administration of nitrites is usually begun with inhalation of amyl nitrite (for 30 seconds out of every minute) followed by sodium nitrite intravenously, in the same dosages as for cyanide poisoning. Infusion of 300 mg of fluid containing 10 ml of 3% NaNO<sub>2</sub>, over 4 min, has been suggested, titrating the infusion rate against the drop in blood pressure to maintain systolic pressure above 80 torr (10.6 kPa).<sup>32-35</sup>

In general, the accumulated experience with nitrite treatment suggests that alone it may be of benefit and in exceptional cases may even be lifesaving. If administered too aggressively, nitrite toxicity may complicate management and if administered too late it will be of no benefit. Such cases are too infrequent for centres to acquire such experience alone and the clinical literature is therefore inevitably anecdotal. With few documented cases on which to rely, the clinician in such circumstances is forced to use judgement in the

absence of experience. Nitrite treatment may be more effective in combination with hyperbaric oxygen but there are no published data.<sup>3,23,26,29,32-37</sup>

Sodium thiosulphate has also been proposed as a treatment on the grounds that methaemoglobin so produced would likewise compete with haeme from sulphide and that sulfoxidation may also promote clearance of sulphide. The concept is supported by limited laboratory studies suggesting that pre-treatment with thiosulphate reduces sulphide toxicity in animals. However, mammals generally clear sulphide rapidly anyway and thiosulphate is a metabolite of sulphide, not a substrate for enzymatic oxidation.<sup>31</sup> Treatment with thiosulphate does not appear to make sense biochemically. The sparse anecdotal data on human treatment does not support a recommendation of this approach to treatment.<sup>22,30</sup>

There is evidence that the respiratory paralysis observed in some fatal knockdowns is associated with monoamine oxidase inhibition.<sup>38</sup> This inhibition is reversed by dithiothreitol (DTT), which also displaces sulphide from brain tissue *in vitro* following exposure in animals.<sup>39</sup> DTT has also been found to be protective if given to animals as a pre-treatment prior to exposure. At present, this approach must be considered tentative and not ready for clinical application.

One report suggests administration of ascorbic acid (vitamin C) intravenously to reverse methaemoglobinemia. Although probably benign, the effectiveness of this treatment is not documented and methaemoglobinemia is not the primary problem. The approach cannot be recommended in the absence of evidence for utility.<sup>40</sup>

Treatment with oxygen and supportive care alone had been recommended in order to avoid further complicating the toxic effects with iatrogenic anoxia and nitrite toxicity. However, confirmation that oxygen therapy works alone is limited to anecdotal reports and experimental studies with H<sub>2</sub>S-exposed mice which did not show increased survival with oxygen alone. Unlike cyanide intoxication, there is no evidence that H<sub>2</sub>S intoxication would confer a risk on the rescuer during mouth-to-mouth resuscitation.<sup>22</sup>

Hyperbaric oxygen therapy is an attractive and logical option for treating H<sub>2</sub>S intoxication. Laboratory studies and anecdotal evidence of selected cases suggests that it may be effective.<sup>41,42</sup> Given the low morbidity of hyperbaric oxygen treatment in skilled hands, it is a prudent intervention if facilities are available. Long-term use of hyperbaric oxygen, of course, is associated with the risk of oxygen toxicity but the duration of treatment in this instance is relatively short.<sup>43</sup> In the absence of a standard protocol, it would be reasonable to treat as for carbon monoxide. Although a reasonable approach to treatment, and perhaps lifesaving, hyperbaric oxygen therapy has failed to prevent neurological sequelae of H<sub>2</sub>S intoxication.<sup>26</sup>

The sour gas industry and the gas industry generally present the opportunity for a variety of other occupational exposures, some of them related to the

processing and desulfuration of gas.<sup>1,9,44</sup> These exposures may be significant in special situations but few come close to the peril of hydrogen sulphide. Recently, the Canadian oil and gas industry has developed a code of practice for handling hydrogen sulphide and other chemical hazards associated with the industry.<sup>45</sup>

## REFERENCES

- Hoffman HE, Guidotti TL. Health hazards in the natural gas industry. In: Greenberg MI, ed. *Occupational, Industrial, and Environmental Toxicology*. St Louis: Mosby. In press.
- Kangas J, Jäppinen P, Savolainen H. Exposure to hydrogen sulfide, mercaptans, and sulphur dioxide in pulp industry. *Am Ind Hyg Ass J* 1984; 45: 787-790.
- Hoidal CR, Hall AH, Robinson MD, Kulig K, Rumack BH. Hydrogen sulfide poisoning from toxic inhalations of roofing asphalt. *Ann Emerg Med* 1986; 15: 826-830.
- Burnett WW, King EG, Grace M, Hall WF. Hydrogen sulfide poisoning: review of 5 years' experience. *Can Med Assn J* 1977; 117: 1277-1180.
- Parra O, Monso E, Gallego M, Morera J. Inhalation of hydrogen sulphide: A case of subacute manifestations and long term sequelae. *Brit J Ind Med* 1991; 48: 286-287.
- Milby TH. Hydrogen sulfide intoxication. Review of the literature and report of unusual accident resulting in tow cases of nonfatal poisoning. *J Occup Med* 1962; 4: 431-437.
- Energy Resources Conservation Board. *Alberta Environment Sour-Gas Processing-Plant Applications — A Guide to Content*. Calgary: Energy Resources Conservation Board, 1981. Guide G-26.
- Arnold IMF, Dufresne RM, Alleyne BC, Stuart PJW. Health implications of occupational exposures to hydrogen sulfide. *J Occup Med* 1985; 27: 373-376.
- Evans H. Occupational hygiene at an Alberta (Canada) natural gas processing plant. *Ann Occup Hyg* 1989; 47: 221-224.
- Tansy MF, Kendall FM, Fantasia J, Landin WE, Oberly R, Sherman W. Acute and subchronic toxicity studies of rats exposed to vapors of methyl mercaptan and other reduced-sulphur compounds. *J Tox Env Health* 1981; 8: 71-88.
- Turner RM, Fairhurst S. *Toxicology of Substances in Relation to Major Hazards: Hydrogen Sulphide*. London: HMSO, 1990: 1-14.
- Beauchamp RO Jr, et al. A critical review of the literature on hydrogen sulphide toxicity. *DRC Crit Rev Toxicol* 1984; 13: 25-97.
- Reiffenstein RJ, Hulbert WC, Roth SH. Toxicology of hydrogen sulphide. *Annu Rev Pharmacol Toxicol* 1992; 13: 109-134.
- Guidotti TL. Occupational exposure to hydrogen sulfide in the sour gas industry: some unresolved issues. *Int Arch Occ Env Health* 1994; 66: 153-160.
- Glass DC. A review of the health effects of hydrogen sulphide exposure. *Ann Occup Hyg* 1990; 34: 323-327.
- Public Health Service. *Criteria for a recommended standard . . . occupational exposure to hydrogen sulfide*. US Department of Health Education and Welfare, Centre for Disease Control, 1977. (DHEW [NIOSH] Publication No. 77-158).
- World Health Organization International Programme on Chemical Safety. *Environmental Health Criteria 19: Hydrogen Sulphide*. Geneva: WHO, 1983.
- US National Research Council, Committee on Medical & Biological Effects of Environmental Pollutants: Subcommittee on Hydrogen Sulfide. *Hydrogen Sulfide*. Baltimore: University Park Press, 1979.
- Geer JJ, Reiffenstein R, Almeida AF, Carter JE. Sulfide-induced perturbations of the neuronal mechanisms controlling breathing in rats. *J Appl Physiol* 1995; 78(2): 433-440.
- Prior M, Sharma AK, Yong S, Lopez A. concentration-item interactions in hydrogen sulfide toxicity in rats. *Can J Vet Res* 1988; 52: 375-379.

21. Osbern LN, Crapo RO. Dung lung: a report of toxic exposure to liquid manure. *Ann Intern Med* 1981; 95: 312-314.
22. Smith RP, Kruszyna R, Kruszyna H. Management of acute sulfide poisoning: effects of thiosulfate, oxygen, and nitrite. *Arch Environ Health* 1976; 85: 756-758.
23. Stine RJ, Slosberg B, Beacham BE. Hydrogen sulfide intoxication: a case report and discussion of treatment. *Ann Intern Med* 1976; 85: 756-758.
24. Richardson DB. Respiratory effects of chronic hydrogen sulfide exposure. *Am J Ind Med* 1995; 28: 99-108.
25. Kilburn K. Case report: profound neurobehavioural deficits in an oil field worker overcome by hydrogen sulfide. *Am J Med Sci* 1993; 306: 301-305.
26. Snyder JW, Safir EF, Summerville GP, Middleberg RA. Occupational fatality and persistent neurological sequelae after mass exposure to hydrogen sulfide. *Am J Emerg Med* 1995; 13: 199-203.
27. Wang DX. A review of 152 cases of acute poisoning of hydrogen sulfide. (In Chinese) *Chin J Prev Med* 1989; 23: 330-332.
28. Wasch HH, Estrin WJ, Yip P, Bowler R, Cone JE. Prolongation of the P-300 latency associated with hydrogen sulfide exposure. *Arch Neurol* 1989; 46: 902-904.
29. Tvedt B, Edland A, Skyberg K, Forberg O. Delayed neuropsychiatric sequelae after acute hydrogen sulfide poisoning: affection of motor function, memory, vision, and hearing. *Acta Neurol Scand* 1991; 84: 348-351.
30. Smith L, Kruszyna H, Smith RP. The effect of on the inhibition of cytochrome c oxidase by cyanide, sulfide or azide. *Biochem Pharmacol* 1977; 26: 2247-2250.
31. Beck JF, Brandbury CM, Conors AJ, Donini JC. Nitrite as antidote for acute hydrogen sulfide intoxication? *Am Ind Hyg Ass J* 1981; 42: 805-809.
32. Vannatta JB. Hydrogen sulfide poisoning: report of four cases and brief review of the literature. *J Okla State Med Ass* 1982; 75: 29-32.
33. Smith RP, Gosselin RE. Hydrogen sulfide poisoning. *J Occ Med* 1979; 21: 93-97.
34. Mack RB. World enough and time — hydrogen sulfide poisoning. *N Carol Med J* 1987; 48: 33-34.
35. Ravizza AG, Carugo D, Cerchiari EL, Cantadore R, Bianchi GE. The treatment of hydrogen sulfide intoxication: oxygen versus nitrites. *Vet Human Toxicol* 1982; 24: 241-242.
36. Whitcraft DD III, Bailey TD, Hart GB. Hydrogen sulfide poisoning treated with hyperbaric oxygen. *J Emerg Med* 1985; 3: 23-25.
36. Peters JW. Hydrogen sulfide poisoning in a hospital setting. *J Am Med Assn* 1981; 246: 1558-1589.
37. Audeau FM, Gnaharan C, Davey K. Hydrogen sulphide poisonings associated with pelt processing. *NZ Med J* 1985; 98: 145-147.
38. Warenycia MW, Smith KA, Blashko CS, Kombian SB, Reiffenstein RJ. Monoamine oxidase inhibition as a sequel of hydrogen sulfide intoxication: increase in brain catecholamine and 5-hydroxytryptamine levels. *Arch Toxicol* 1989; 63: 131-136.
39. Warenycia MW, Goodwin LR, Francom DM, Dieken FP, Kombian SB, Reiffenstein RJ. Dithiothreitol liberates non-acid labile sulfide from brain tissue of H<sub>2</sub>S-poisoned animals. *Arch Toxicol* 1990; 64(8): 650-655.
40. Demaret D, Fialaire J. Les intoxications par l'hydrogène sulfuré dans une raffinerie de gaz naturel. *J Europ Toxicol* 1974; 1: 32-36.
41. Smilkstein MJ, Bronstein AC, Pickett HM, Rumack BH. Hyperbaric oxygen therapy for severe hydrogen sulphide poisoning. *J Emerg Med* 1985; 3: 27-30.
43. Gorman DF. Problems and pitfalls in the use of hyperbaric oxygen for the treatment of poisoned patients. *Med Toxicol Adverse Drug Exp* 1989; 4: 393-399.
44. Cottle MKW, Guidotti TL. Process chemicals in the oil and gas industry: potential occupational hazards. *Toxicol Ind Health* 1989; 6: 41-56.
45. Drummond I, House F, McMullen WG, Stewart JA. Hydrocarbon gases and hydrogen sulfide — A code of practice. *Appl Occ Env Hyg* 1996; 11: 493-500.
